# Supplementary material
Source: Research Square preprint supplement (doi:10.21203/rs.3.rs-9426248/v1)
Supplement: Supplementary file 1 [file 35dbeb389d13f3d7d7fad170.docx]

**Appendices**

**Appendix 1: Different layout formats in experimental full-screen mode**

**DP (Different page)**


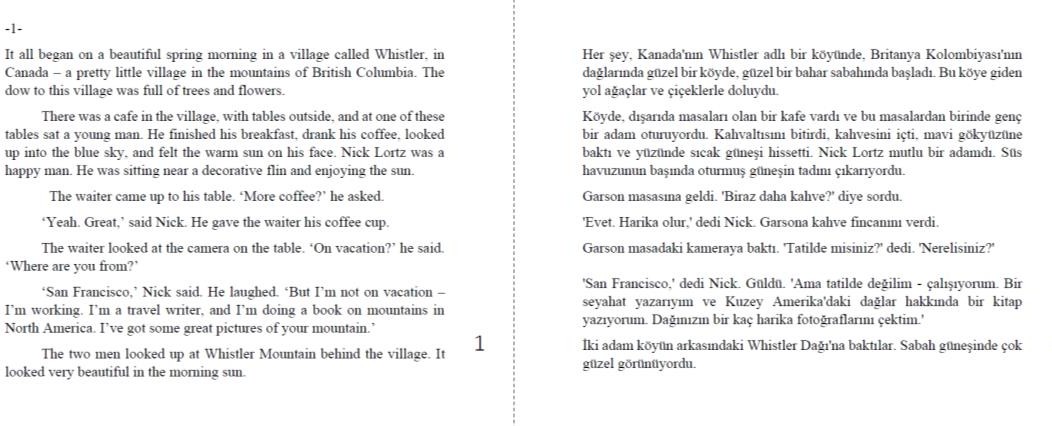


**SP (Same page)**


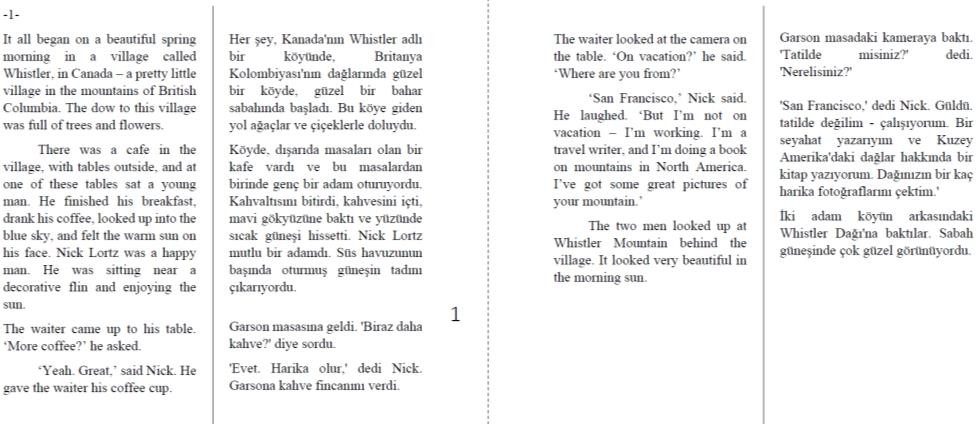


**ST (Stacked)**


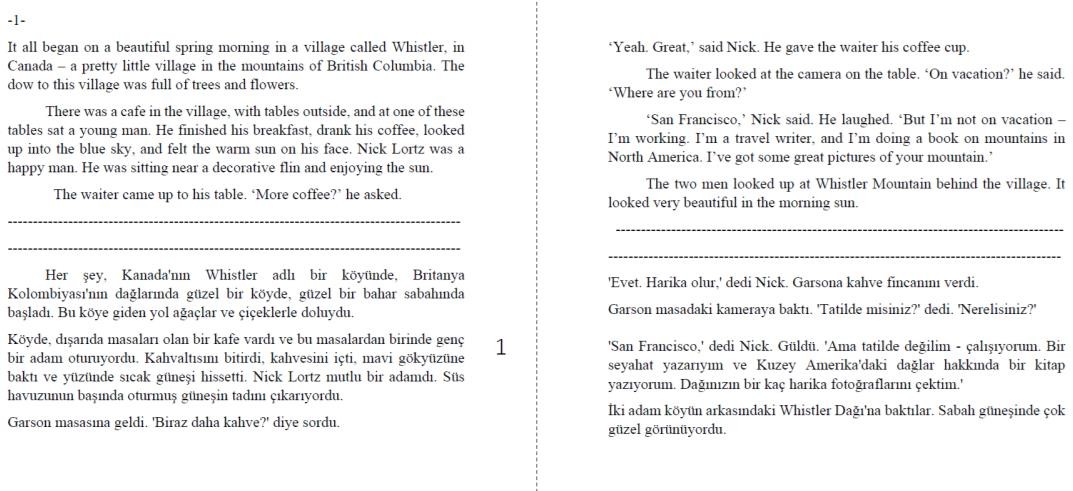


**Appendix 2: Sample pseudoword integration through AI-generated sentences**


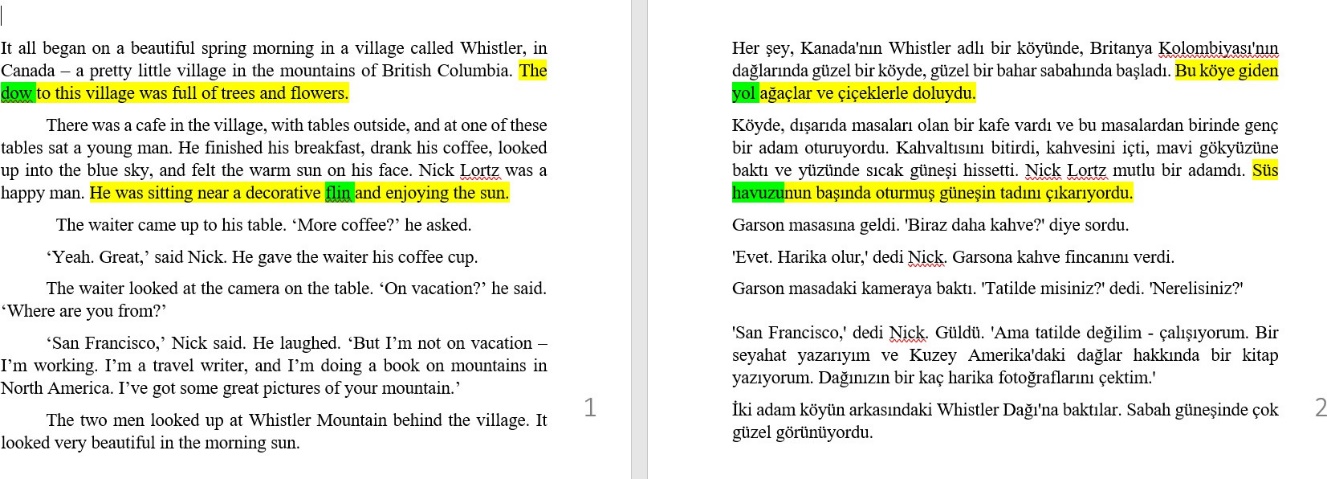


**Appendix 3: AOI samples for layouts**

**SP AOIS**


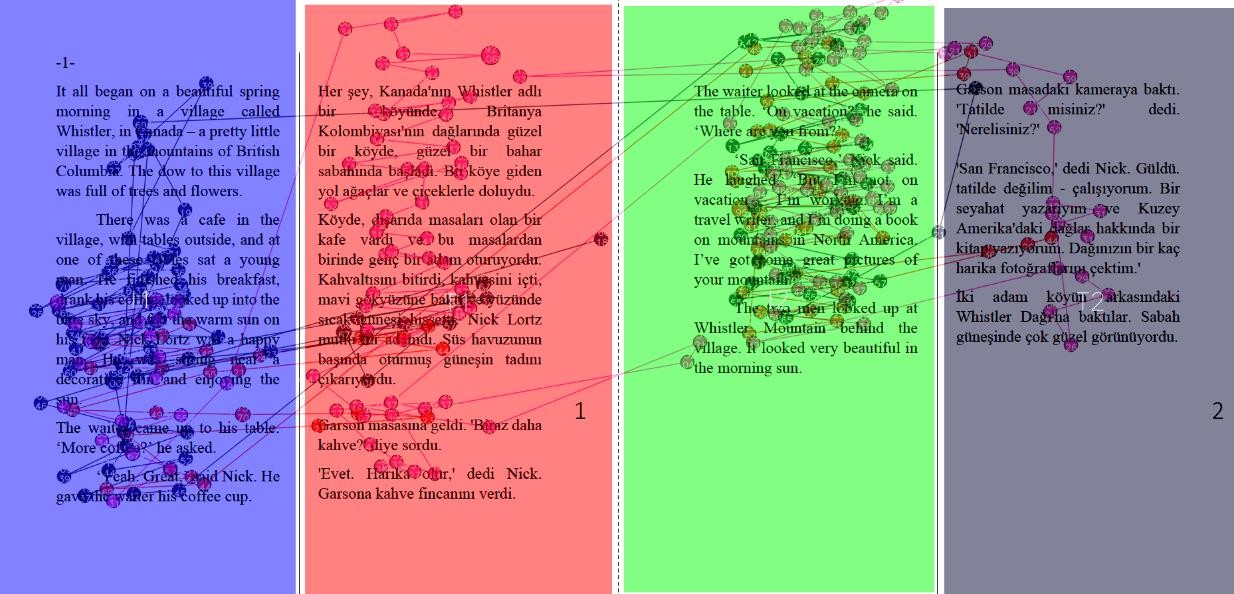


**ST AOIs**


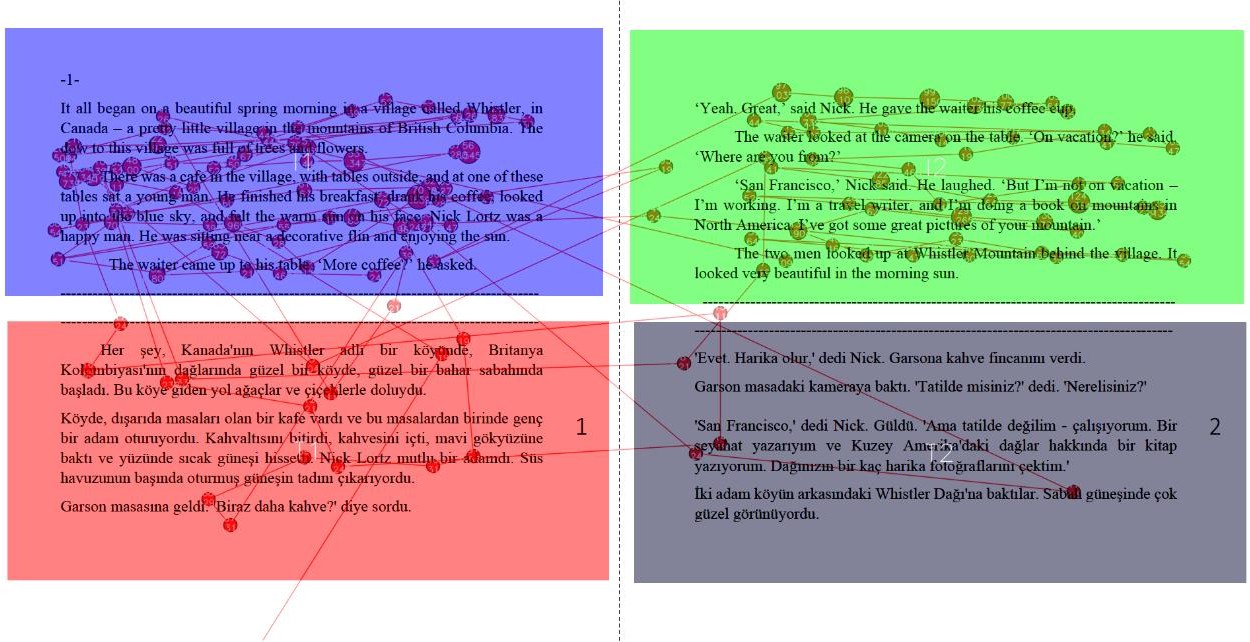


**DP AOIs**


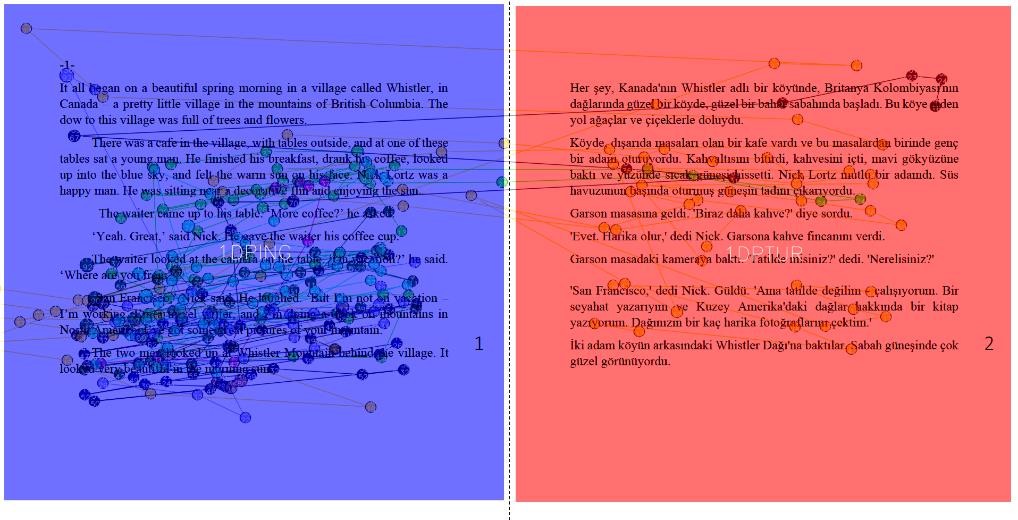


**Appendix 4: Vocabulary Tests**

Name/Surname:

1. **VOCABULARY TEST 1- FORM RECOGNITION**

Please circle the words you saw in the text. You have only **8 chances to circle**.

| dow | withor | arew |
| --- | --- | --- |
| stomed | tim | prone |
| pyramid | tosh | bup |
| cunk | agree | sense |
| slisk | flin | stamy |
| corat | seat | thoic |
| dablet | cloud | spick |
| tea | gat | lady |

1. **VOCABULARY TEST 2- MEANING RECALL TEST**

In this section, please fill in the table.

| Word | I don’t have any ideas | Turkish meaning? | It can be this Turkish word | I don’t know its Turkish equivalence, yet I can describe it. |
| --- | --- | --- | --- | --- |
| **apartment** |  |  |  |  |
| **cat** |  |  |  |  |
| **dow** |  |  |  |  |
| **bup** |  |  |  |  |
| **flin** |  |  |  |  |
| **cunk** |  |  |  |  |
| **thoic** |  |  |  |  |
| **spick** |  |  |  |  |
| **dablet** |  |  |  |  |
| **withor** |  |  |  |  |

1. **VOCABULARY TEST 3- MEANING RECOGNITION TEST**

Please circle the correct option in the table.

| **apartment** | Apartman | Kulübe | Boşluk | I don’t know |
| --- | --- | --- | --- | --- |
| **cat** | Kedi | Dağ | Daire | I don’t know |
| **dow** | Yol | Gerçek | Bıyık | I don’t know |
| **bup** | Kablo | Meslek | Masa | I don’t know |
| **flin** | Demir | Havuz | Çit | I don’t know |
| **cunk** | Söylenti | Yüzük | Esinti | I don’t know |
| **thoic** | Dünya | Kargaşa | Kabus | I don’t know |
| **spick** | Çorap | Mont | Yer | I don’t know |
| **dablet** | Savaş | Ağaç | Vadi | I don’t know |
| **withor** | Çaba | Dikkat | Görev | I don’t know |

**Appendix 5: Comprehension Check**

Name/Surname: **READING COMPREHENSION 1**

A. Please choose the best option.

1. The story starts in a

a. Summer night

b. Spring morning

c. Winter day

d. Fall night

2. In the beginning, the story takes place in

1. Canada
2. USA
3. Argentina
4. France

3. Nick was writing a book about

1. Flowers
2. Mountains
3. Houses
4. Coffee types

4. While Nick was enjoying his coffee, a smiled and came near him.

a. A boy

b. A man with white hair

c. A beautiful girl

d. An ugly woman

5. In the half open bag on the table, there was a letter writing “ ” on it.

a. New York

b. Sao Paolo

c. Vancouver

d. Paris

**READING COMPREHENSION 2**

1. **Please circle True or False.**
2. A man with very long, white hair walked across the road. T/F
3. The waiter came up to Nick’s table and said ‘More coffee?’. T/F
4. Nick was a travel writer. T/F
5. The name of the village was “Whimptown”. T/F
6. It was snowing when Nick was enjoying in the cafe. T/F
